# Supplementary material
Source: PubMed Central journal article supplement (PMC8322005)
Supplement: 702_2021_2366_MOESM1_ESM.pdf [file 702_2021_2366_MOESM1_ESM.pdf]

**Article Title:** Smell and taste in idiopathic blepharospasm.

**Journal Name:** Journal of Neural Transmission

**Author Names:** Julie Gamain<sup>1</sup>, Thorsten Herr<sup>1</sup>, Robert Fleischmann MD<sup>1</sup>, Andrea Stenner MD<sup>2</sup>, Marcus Vollmer PhD<sup>3</sup>, Carsten Willert MD<sup>4</sup>, Birgitt Veit MD<sup>5</sup>, Bernhard Lehnert MD<sup>6</sup>, Jan-Uwe Mueller MD<sup>7</sup>, Frank Steigerwald MD<sup>1</sup>, Frank Tost MD<sup>8</sup>, Martin Kronenbuerger MD<sup>1,9,10</sup>

**Affiliations:**

<sup>1</sup>Department of Neurology, University of Greifswald, Greifswald, Germany

<sup>2</sup>Department of Neurology, Paracelsus Clinic Zwickau, Zwickau, Germany

<sup>3</sup>Institute of Bioinformatics, University of Greifswald, Greifswald, Germany

<sup>4</sup>Neurology Group Practice, Stralsund, Germany

<sup>5</sup>Neurology Group Practice, Neubrandenburg, Germany

<sup>6</sup>Department of Otorhinolaryngology, University of Greifswald, Greifswald, Germany

<sup>7</sup>Department of Neurosurgery, University of Greifswald, Greifswald, Germany

<sup>8</sup>Department of Ophthalmology, University of Greifswald, Greifswald, Germany

<sup>9</sup>Department of Neurology, Johns Hopkins University, Baltimore, Maryland, USA

<sup>10</sup>Department of Neurology, Medical School OWL, University of Bielefeld, Germany

**Email for corresponding author:** (Martin Kronenbuerger) martinkro2@hotmail.com

**Electronic Supplementary Material Table 1** Botulinum toxins used in subjects with blepharospasm

| Subject, ID | Botulinum toxin used  | dose per eye, U |
|-------------|-----------------------|-----------------|
| 1           | Abobotulinum toxin A  | 140             |
| 2           | -                     | -               |
| 3           | Onabotulinum toxin A  | 81              |
| 4           | Incobotulinum toxin A | 40              |
| 5           | Abobotulinum toxin A  | 152             |
| 6           | -                     | -               |
| 7           | Incobotulinum toxin A | 60              |
| 8           | Incobotulinum toxin A | 30              |
| 9           | Incobotulinum toxin A | 30              |
| 10          | -                     | -               |
| 11          | -                     | -               |
| 12          | Onabotulinum toxin A  | 48              |
| 13          | -                     | -               |
| 14          | Incobotulinum toxin A | 112             |
| 15          | Onabotulinum toxin A  | 49              |
| 16          | Abobotulinum toxin A  | 200             |
| 17          | Abobotulinum toxin A  | 200             |

ID, identification number; U, units; Subjects 1, 3, 4, 5, 7, 8, 9 and 12 participated in the adjacent study on the effects of botulinum toxin on the chemical senses; “-“, subjects with blepharospasm, who never had botulinum toxin or stopped botulinum toxin treatment more than 6 months before the study.
