# Supplementary material
Source: PubMed Central journal article supplement (PMC8322005)

**Article Titel:** Smell and taste in idiopathic blepharospasm.

**Journal Name:** Journal of Neural Transmission

**Author Names:** Julie Gamain<sup>1</sup>, Thorsten Herr<sup>1</sup>, Robert Fleischmann MD<sup>1</sup>, Andrea Stenner MD<sup>2</sup>, Marcus Vollmer PhD<sup>3</sup>, Carsten Willert MD<sup>4</sup>, Birgitt Veit MD<sup>5</sup>, Bernhard Lehnert MD<sup>6</sup>, Jan-Uwe Mueller MD<sup>7</sup>, Frank Steigerwald MD<sup>1</sup>, Frank Tost MD<sup>8</sup>, Martin Kronenbuerger MD<sup>1,9,10</sup>

**Affiliations:**

<sup>1</sup>Department of Neurology, University of Greifswald, Greifswald, Germany

<sup>2</sup>Department of Neurology, Paracelsus Clinic Zwickau, Zwickau, Germany

<sup>3</sup>Institute of Bioinformatics, University of Greifswald, Greifswald, Germany

<sup>4</sup>Neurology Group Practice, Stralsund, Germany

<sup>5</sup>Neurology Group Practice, Neubrandenburg, Germany

<sup>6</sup>Department of Otorhinolaryngology, University of Greifswald, Greifswald, Germany

<sup>7</sup>Department of Neurosurgery, University of Greifswald, Greifswald, Germany

<sup>8</sup>Department of Ophthalmology, University of Greifswald, Greifswald, Germany

<sup>9</sup>Department of Neurology, Johns Hopkins University, Baltimore, Maryland, USA

<sup>10</sup>Department of Neurology, Medical School OWL, University of Bielefeld, Germany

**Email for corresponding author:** (Martin Kronenbuerger) martinkro2@hotmail.com

**Electronic Supplementary Material Figure 2** Flow chat about screening of healthy controls

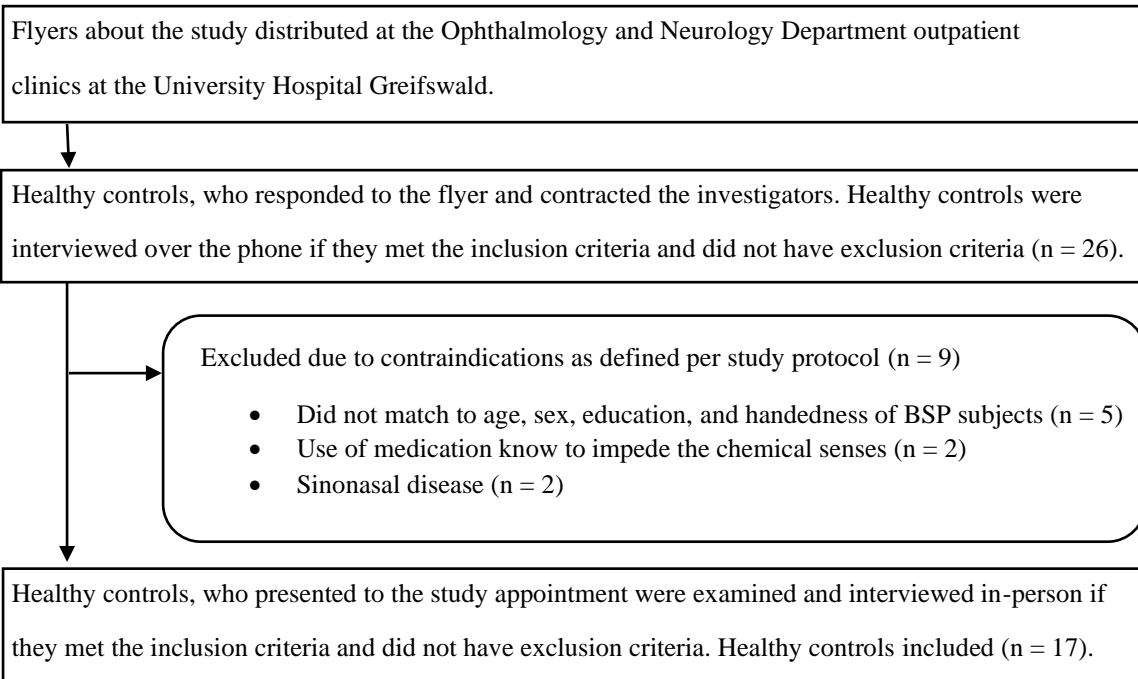

Supplement: 702_2021_2366_MOESM3_ESM.pdf [file 702_2021_2366_MOESM3_ESM.pdf]
